# Supplementary material for: Hypoxia‐inducible factor 1‐alpha does not regulate osteoclastogenesis but enhances bone resorption activity via prolyl‐4‐hydroxylase 2
Source: PubMed Central journal article supplement (PMC5518186; doi:10.1002/path.4906), 2017-05-29
Supplement: PATH-242-322-s002.pdf [file PATH-242-322-s002.pdf]

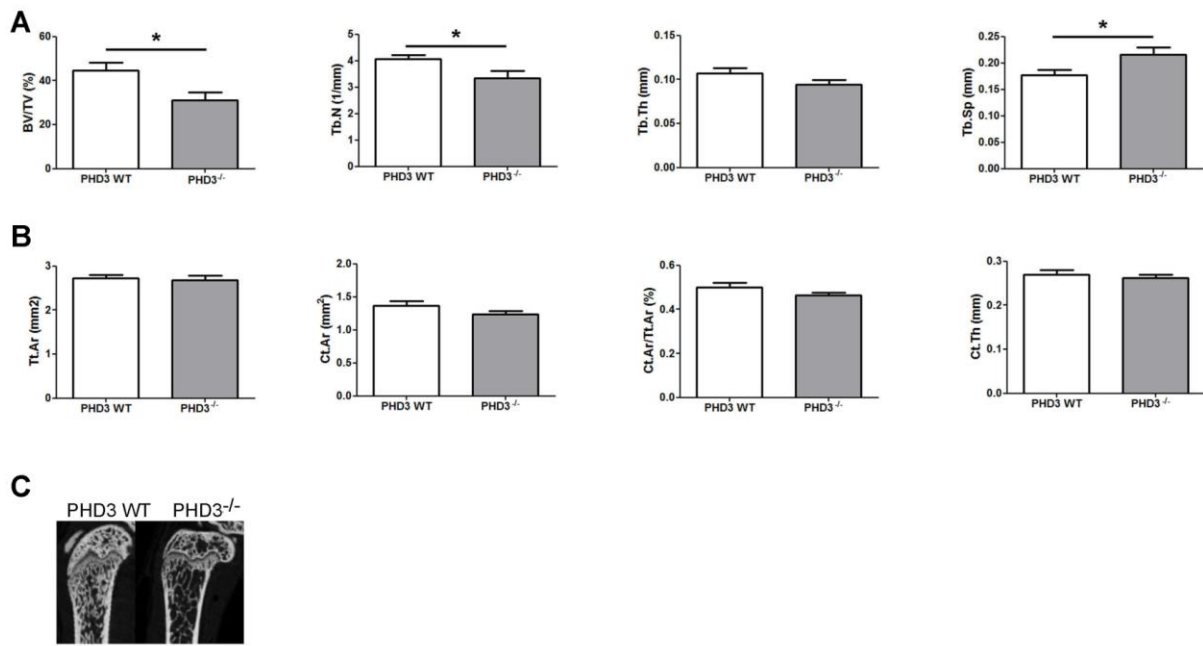

**Supplementary Figure 2. MicroCT of femoral trabecular and cortical bone from *Phd3*<sup>-/-</sup> and *Phd3*<sup>WT</sup> mice.** (a) Trabecular bone measurements; BV/TV (%), Tb.N (1/mm), Tb.Th (mm) and Tb.Sp (mm) and (b) cortical bone measurements; Tt.Ar (mm<sup>2</sup>), Ct.Ar (mm<sup>2</sup>), Ct.Ar/Tt.Ar (%) and Ct.Th (mm) in *Phd3*<sup>-/-</sup> and *Phd3*<sup>WT</sup> mice. \*, p<0.05. (c) Representative 2D image of femoral bone from *Phd3*<sup>-/-</sup> and *Phd3*<sup>WT</sup> mice.
